# Supplementary material for: Enantioselective effect of cysteine functionalized mesoporous silica nanoparticles in U87 MG and GM08680 human cells and Staphylococcus aureus bacteria
Source: Royal Society of Chemistry journal article supplement (doi:10.1039/d0tb02532a), 2021-01-01
Supplement: d0tb02532a1.pdf [file d0tb02532a1.pdf]

# **Enantioselective effect of Cysteine functionalized Mesoporous Silica Nanoparticles in U87 MG and GM08680 human cells and Staphylococcus aureus bacteria**

## Supporting Information

Marina Martínez-Carmona,<sup>\*,a</sup> Carmela Cela,<sup>a</sup> Vera A. Kuznetsova,<sup>a</sup> Joan A. Geoghegan<sup>b</sup> and Yurii K. Gun'ko.<sup>a</sup>

<sup>a</sup> School of Chemistry, CRANN and AMBER Research Centre, Trinity College Dublin, College Green, Dublin 2, Ireland.

<sup>b</sup> Department of Microbiology, Moyne Institute of Preventive Medicine, School of Genetics and Microbiology, Trinity College Dublin, Dublin 2, Ireland.

<sup>1</sup> Departamento de Oftalmología Experimental, Facultad de Medicina, Universidad de Murcia, Murcia, Spain. Instituto Murciano de Investigación Biosanitaria Virgen de la Arrixaca (IMIB-Arrixaca), Murcia, Spain.

<sup>2</sup> Centro de Biología Molecular Severo Ochoa (CSIC-UAM), c/ Nicolás Cabrera, Universidad Autónoma de Madrid (Campus de Cantoblanco), Madrid, Spain.

\* Corresponding autor: Marina Martínez-Carmona, email: ([marina.m.c1@um.es](mailto:marina.m.c1@um.es)). Phone number: +34 8685318

## 1) Nanoparticles Characterization

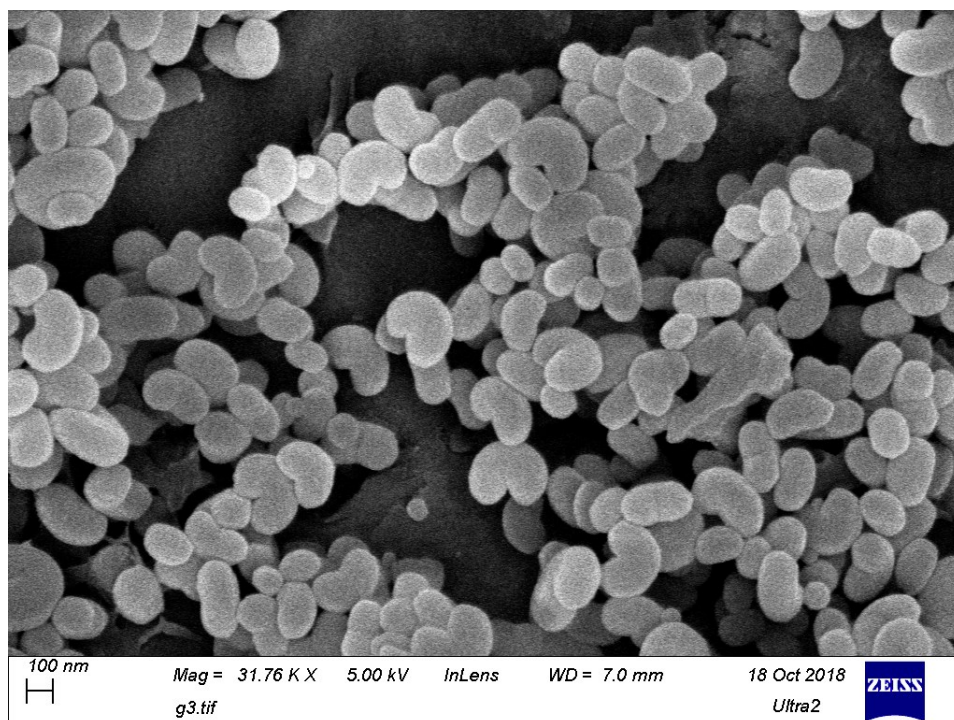

Figure S1. SEM image of COOH-MSN

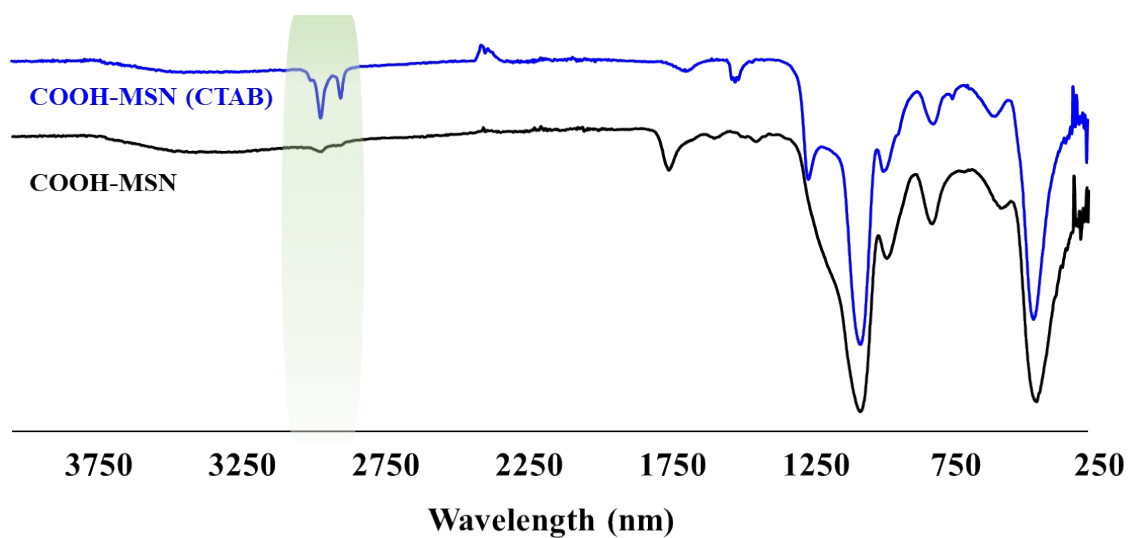

Figure S2. FTIR spectra of COOH- MSN before and after CTAB extraction.

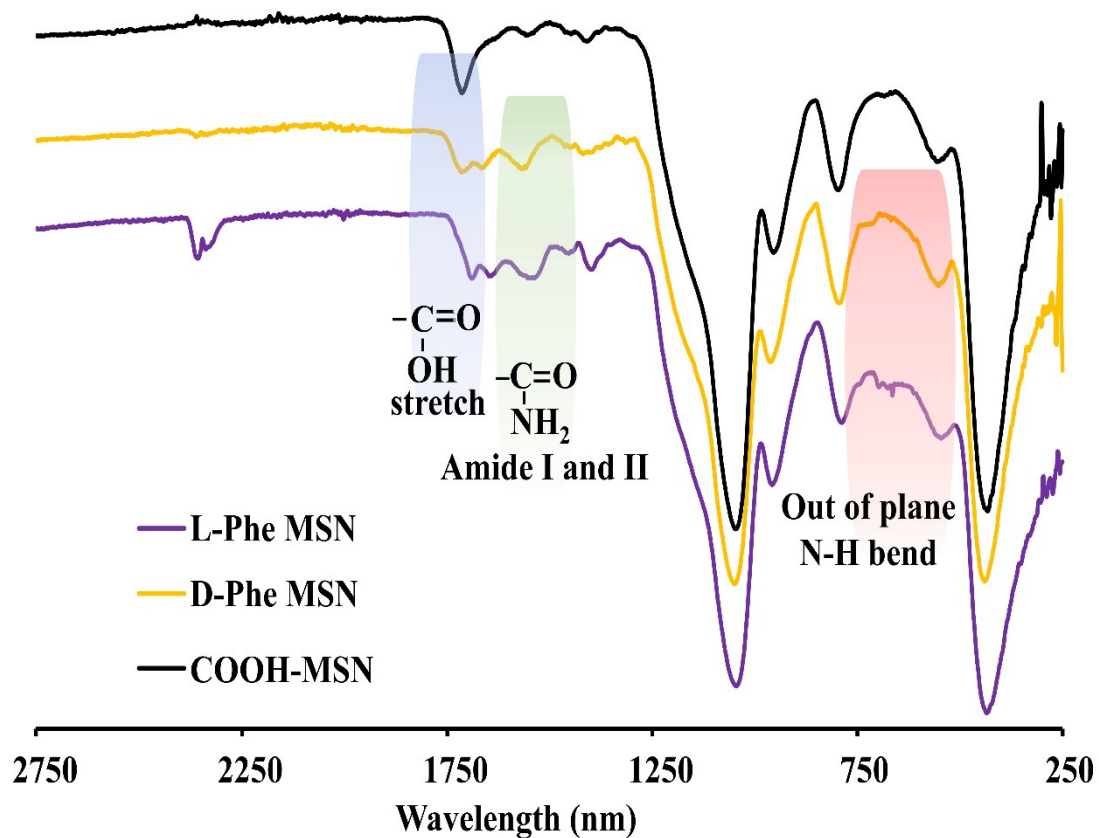

Figure S3. FTIR spectra of COOH- MSN, D-Phen MSN and L-Phen MSN.

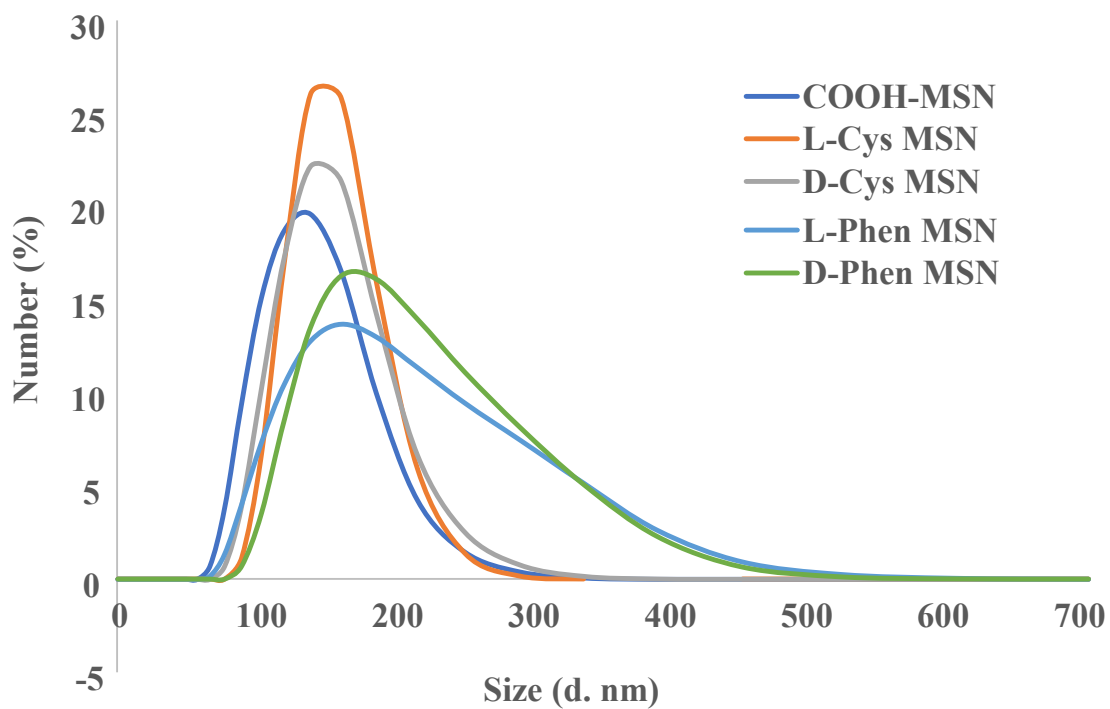

Figure S4. Hydrodynamic size of COOH-MSN, D/L-Cys MSN and D/L-Phen MSN, measured by DLS.

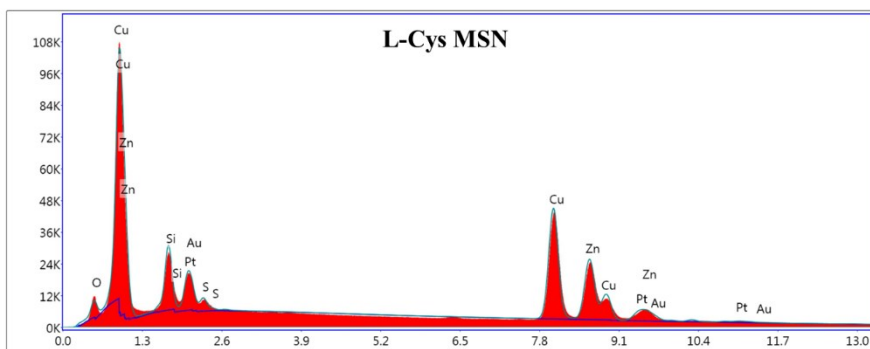

Lsec: 30.0 0 Cnts 0.000 keV Det: Octane Plus Det

| Element | Weight % |
|---------|----------|
| O K     | 3.24     |
| SiK     | 5.51     |
| S K     | 0.92     |
| CuK     | 40.78    |
| ZnK     | 28.16    |
| PtL     | 13.76    |
| AuL     | 7.61     |

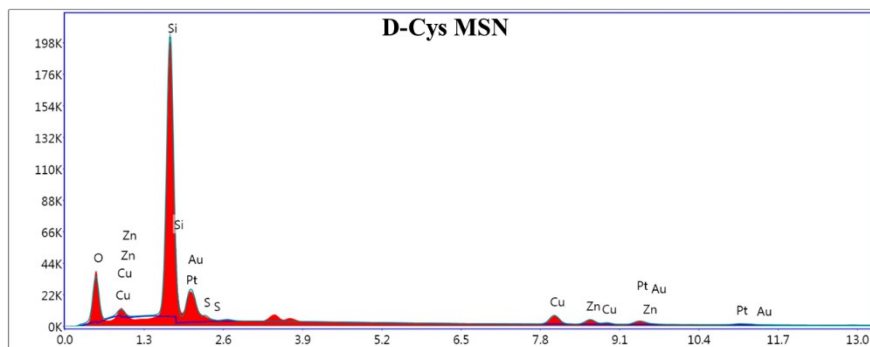

Lsec: 30.0 0 Cnts 0.000 keV Det: Octane Plus Det

| Element | Weight % |
|---------|----------|
| O K     | 25.69    |
| SiK     | 40.97    |
| S K     | 0.94     |
| CuK     | 9.06     |
| ZnK     | 6.03     |
| PtL     | 14.85    |
| AuL     | 2.46     |

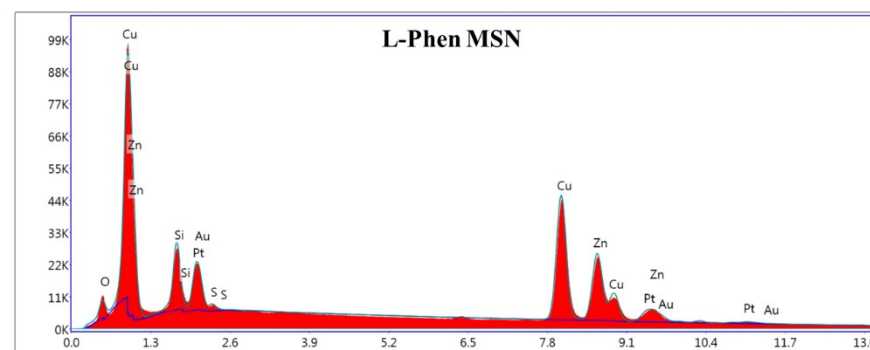

Lsec: 30.0 0 Cnts 0.000 keV Det: Octane Plus Det

| Element | Weight % |
|---------|----------|
| O K     | 5.35     |
| SiK     | 8.68     |
| S K     | 0.30     |
| CuK     | 39.21    |
| ZnK     | 25.94    |
| PtL     | 13.05    |
| AuL     | 7.46     |

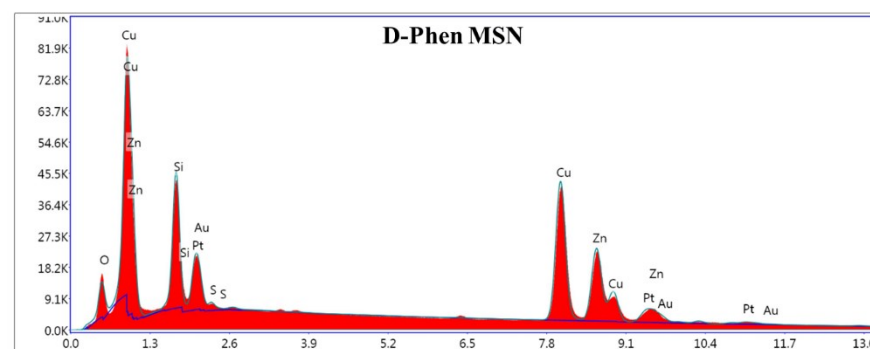

Lsec: 30.0 0 Cnts 0.000 keV Det: Octane Plus Det

| Element | Weight % |
|---------|----------|
| O K     | 3.05     |
| SiK     | 5.31     |
| S K     | 0.32     |
| CuK     | 41.68    |
| ZnK     | 28.38    |
| PtL     | 13.96    |
| AuL     | 7.30     |

Figure S5. TEM-EDX analysis of D-Cys MSN, L-Cys MSN, D-Phen MSN, and L-Phen MSN.

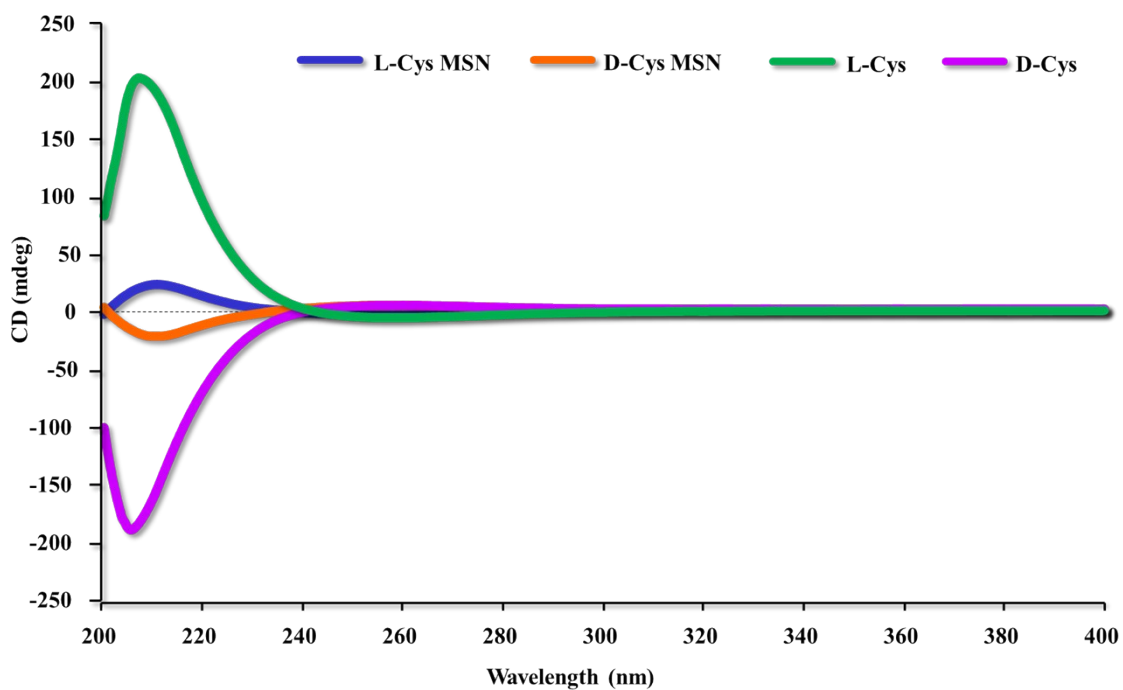

Figure S6. CD spectra of D-Cys, L-Cys, D-Cys MSN and L-Cys MSN.

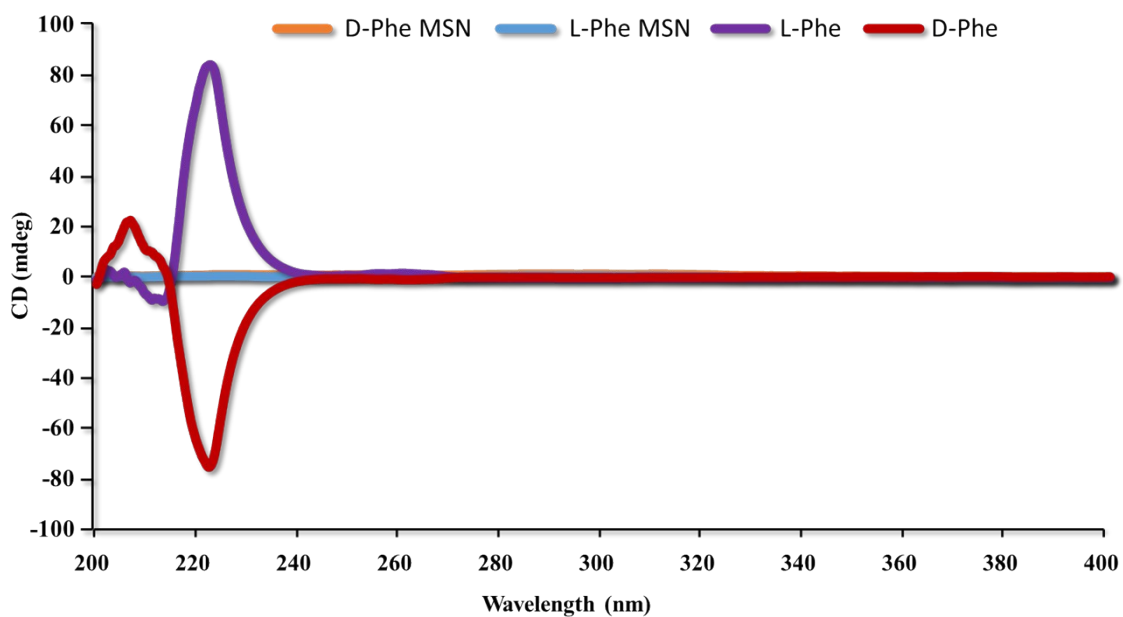

Figure S7. CD spectra of D-Phen, L- Phen, D- Phen MSN and L- Phen MSN.

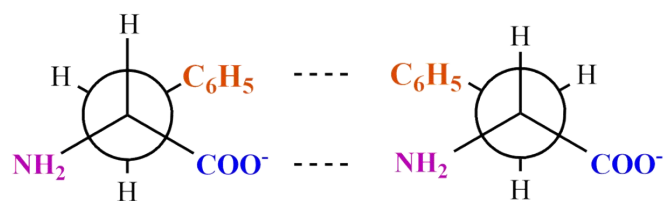

Figure S8. Newman projections of left and right binding conformations of Phen molecules on the MSN surface, corresponding to the opposite stereoisomers.

## 2) Internalization and toxicity of plain MSN in U87 MG cells

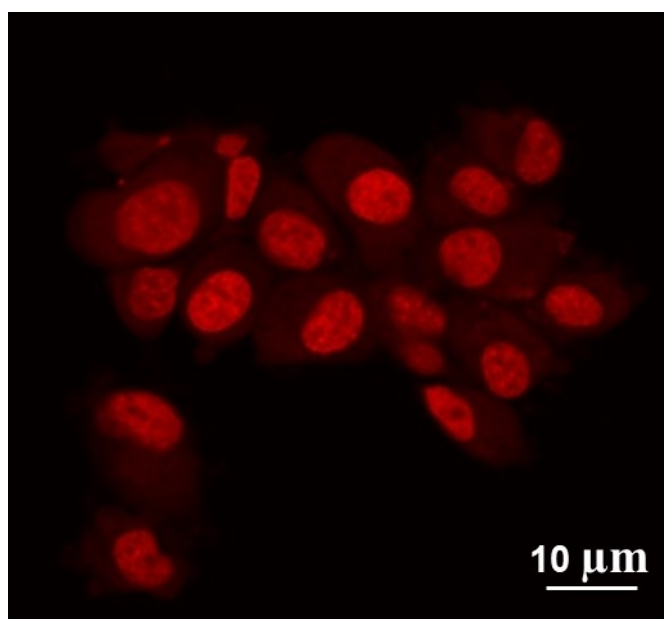

Figure S9. Internalization study by confocal microscopy of 50 μg/mL of green-labelled nanoparticles after 2 h of incubation.

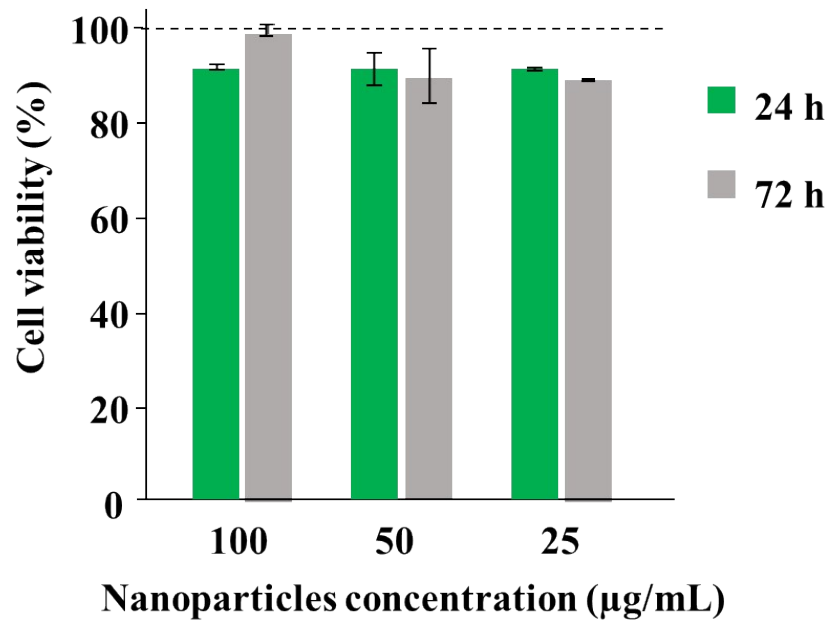

Figure S10. U87 glioblastoma cells viability after 2 h treatment with different concentrations of MSN.

### 3) Flow cytometry Data of D-Cys MSN and L-Cys MSN in U87 MG cells

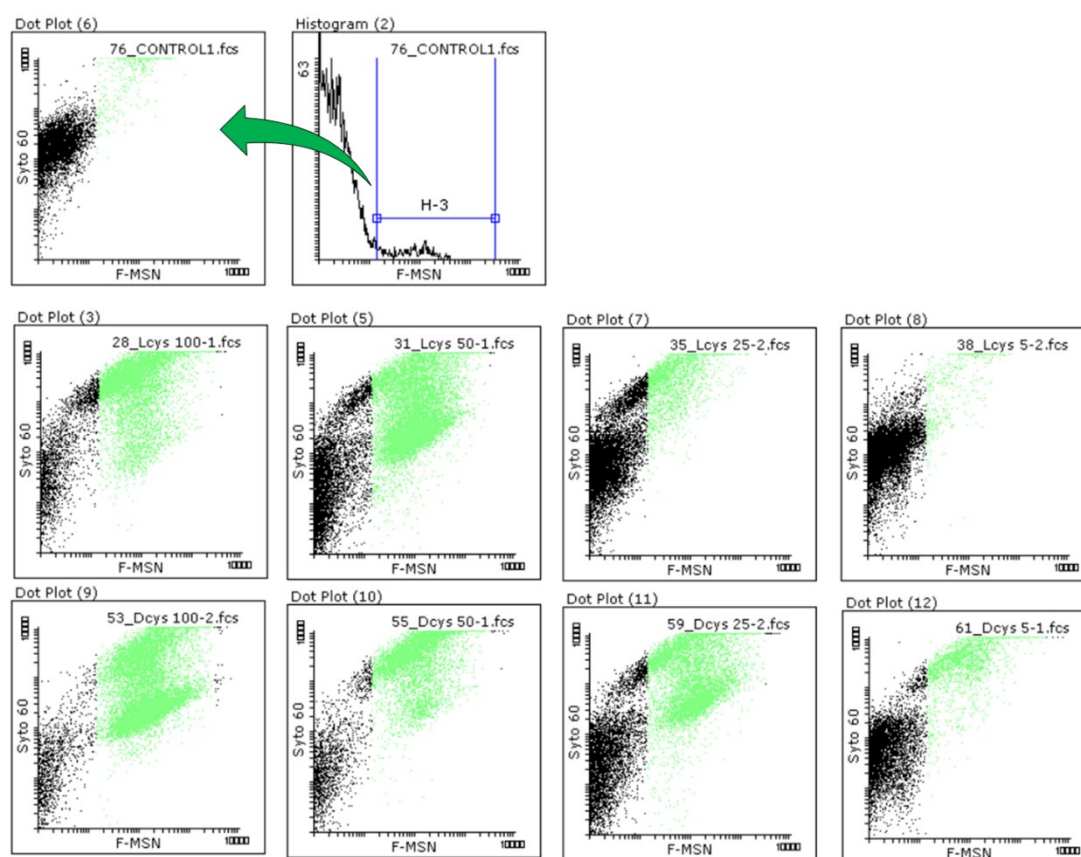

Figure S11. Flow cytometry of the internalization of fluorescent L-/D-Cys-MSN in U87 MG at different incubation concentrations (5, 25, 50 and 100 µg/mL)



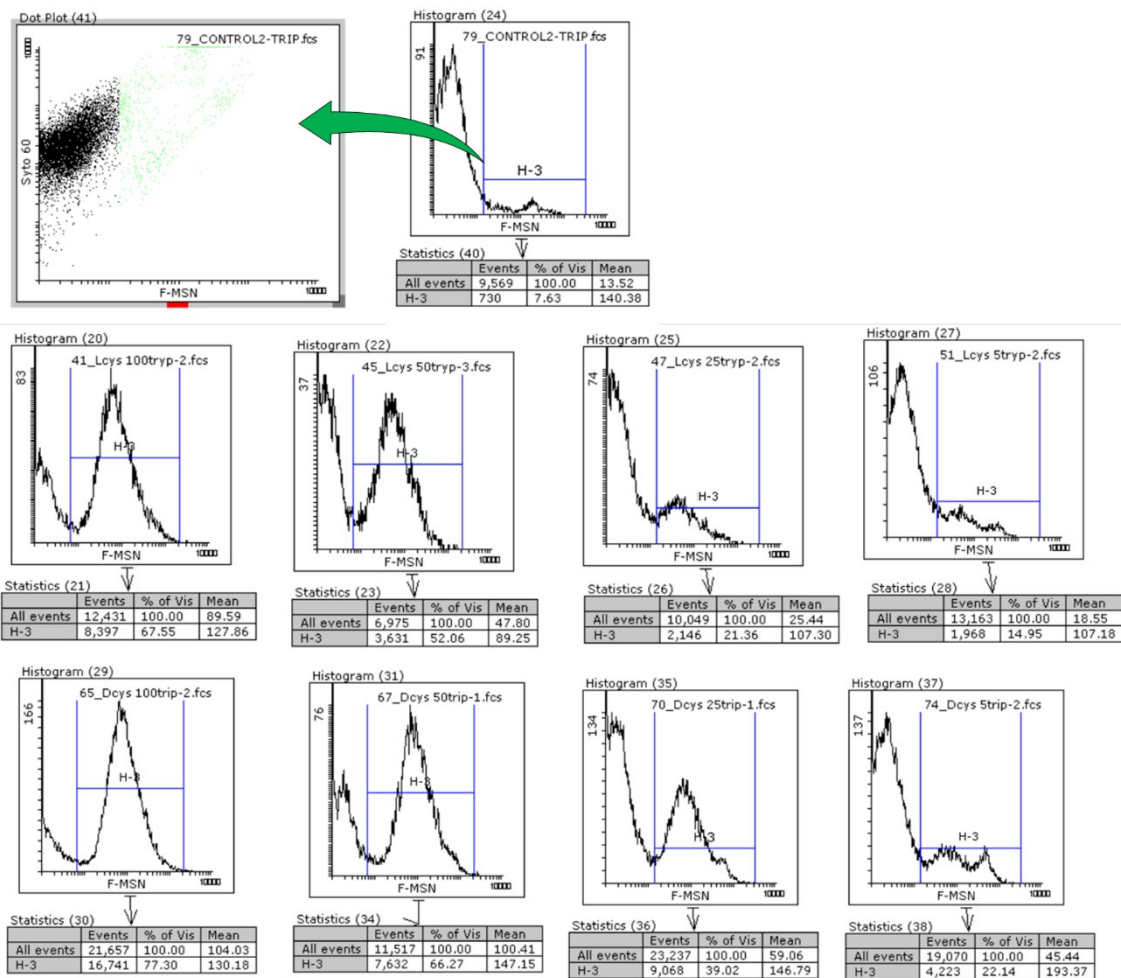

Figure S12. Flow cytometry of trypan blue treated U87 MG cells incubated in the presence to a certain amount (5, 25, 50 and 100  $\mu\text{g/mL}$ ) of fluorescent L-/D-Cys MSN.

#### 4) Flow cytometry Data of D-Phen MSN and L-Phen MSN in U87 MG cells

a)

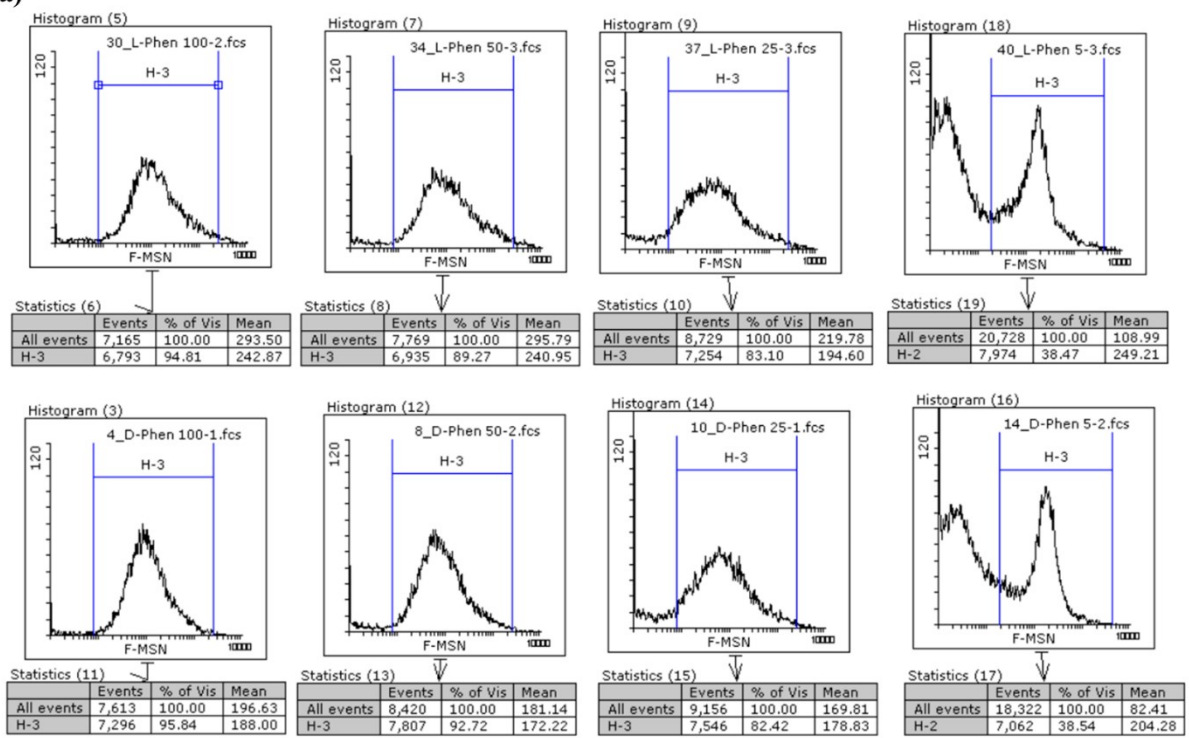

b)

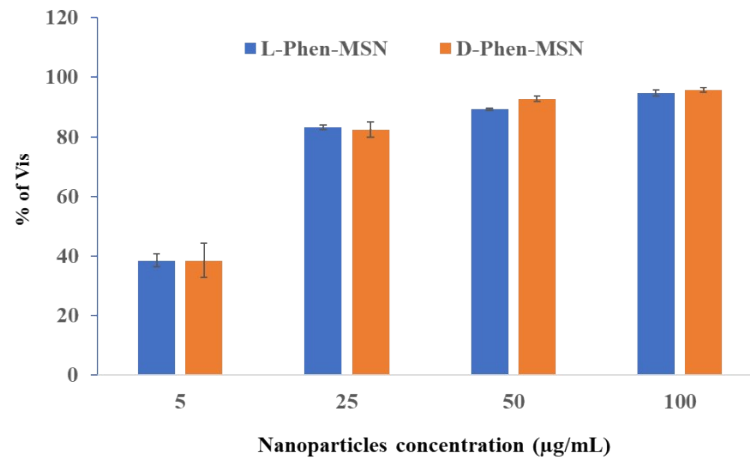

Figure S13. a) Histogram of the internalization of fluorescent L-/D-Phen-MSN in U87 MG at different incubation concentrations (5, 25, 50 and 100 µg/mL) of. b) Evolution of internalization as a function of concentration.

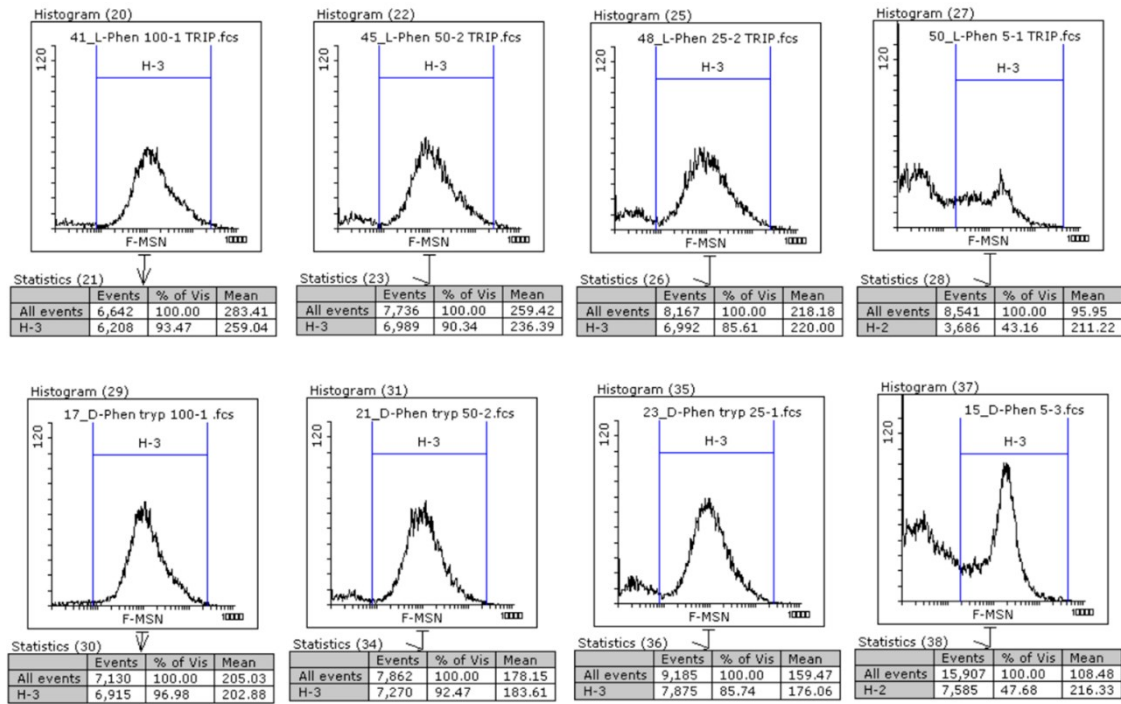

Figure S14. Flow cytometry of trypan blue treated U87 MG cells incubated in the presence to a certain amount (5, 25, 50 and 100 µg/mL) of fluorescent L-/D-Phen MSN.

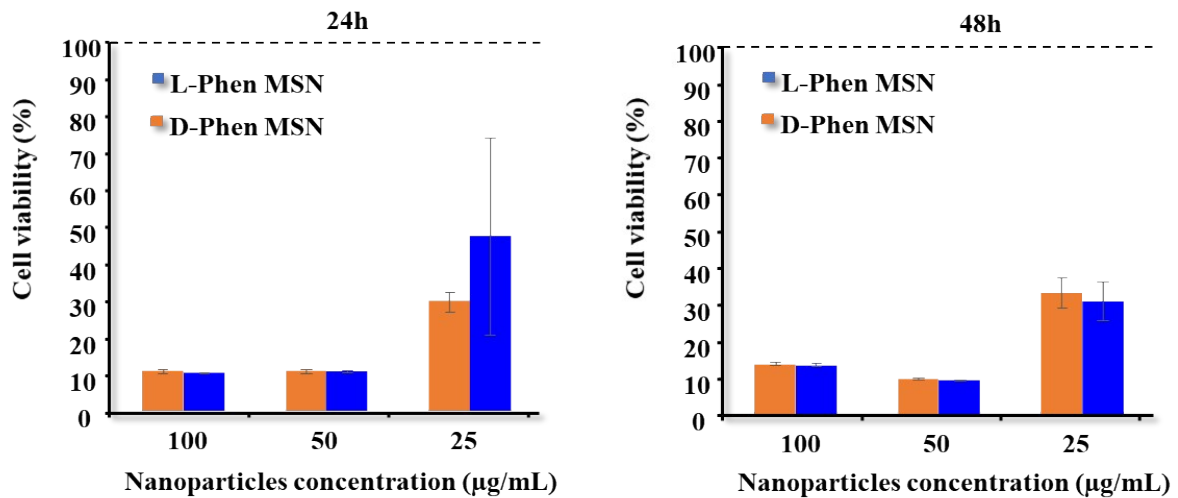

Figure S15. Cytotoxicity assay measured by Cell Counting Kit-8 (CCK-8) in U87 MG cells with different concentrations (25, 50 and 100 µg/mL) of chiral Phen MSN at 24 and 48 h of cell culture. Data are mean ± SEM, experiments were performed in triplicate.

5) Flow cytometry Data of D-Cys MSN and L-Cys MSN in healthy human fibroblast (GM08680)

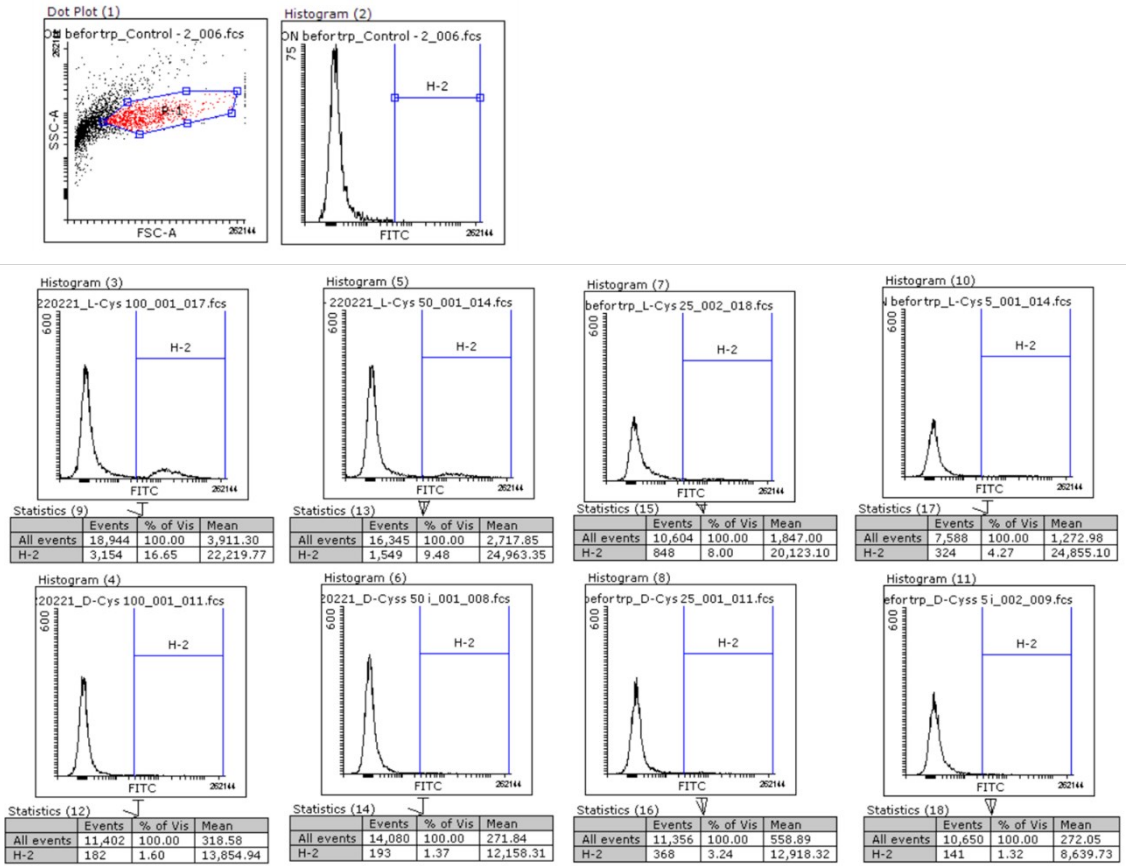

Figure S16. Flow cytometry of the internalization of fluorescent L-/D-Cys-MSN in healthy human fibroblast (GM08680) at different incubation concentrations (5, 25, 50 and 100 µg/mL)

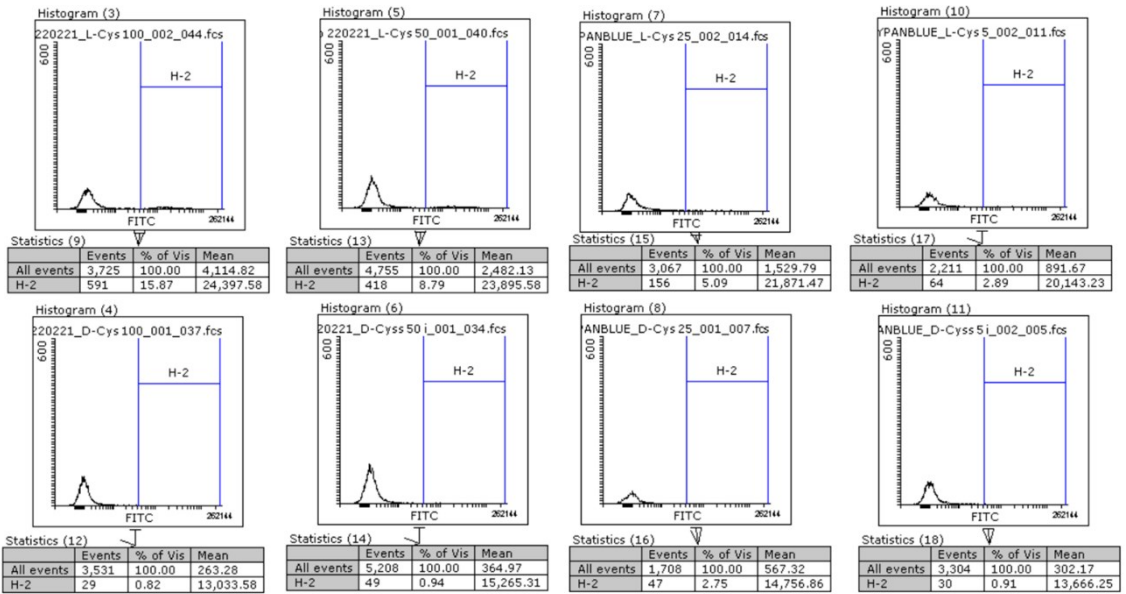

Figure S17. Flow cytometry of trypan blue treated GM08680 cells incubated in the presence to a certain amount (5, 25, 50 and 100 µg/mL) of fluorescent L-/D-Cys MSN.

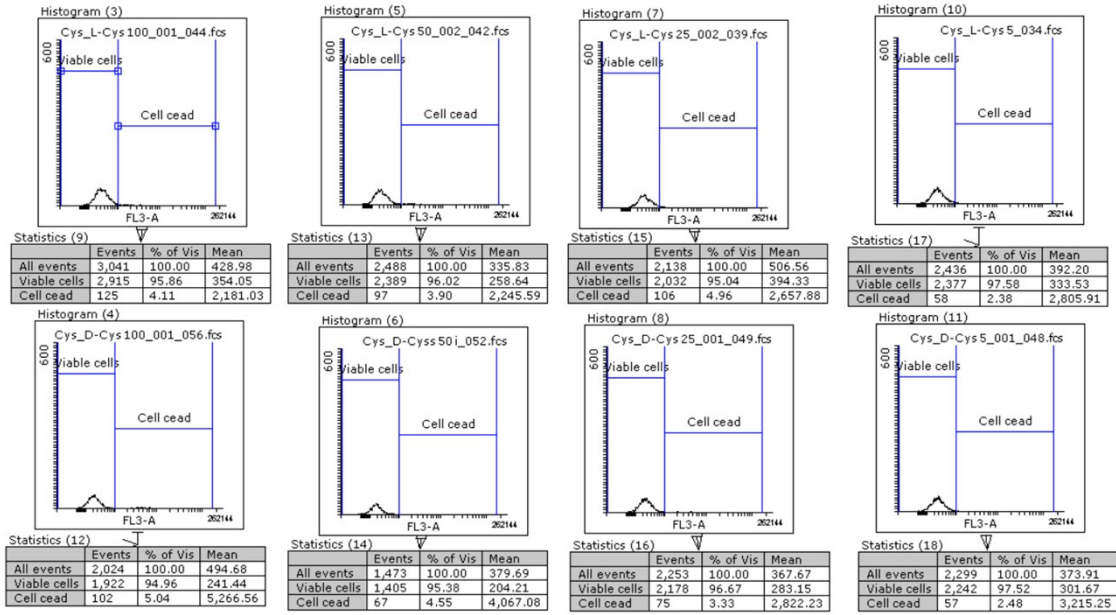

Figure S18. Flow cytometry measurements of the cytotoxicity of a certain amount (5, 25, 50 and 100 µg/mL) of L-/D-Cys MSN in GM08680 cells after 24 h of treatment.

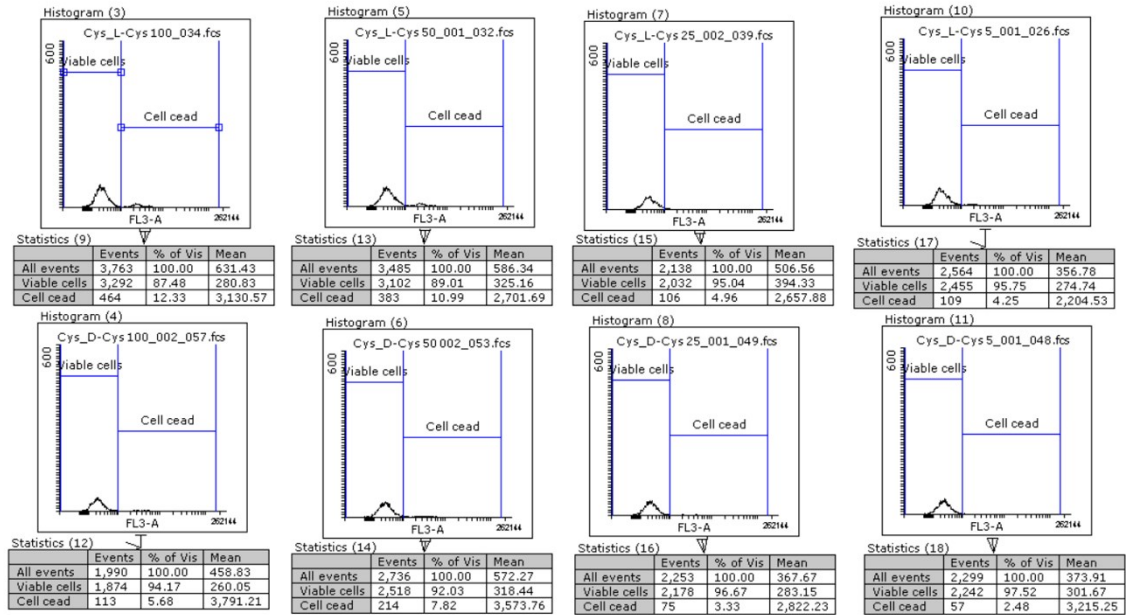

Figure S19. Flow cytometry measurements of the cytotoxicity of a certain amount (5, 25, 50 and 100 µg/mL) of L-/D-Cys MSN in GM08680 cells after 48 h of treatment.



## 6) Flow cytometry Data of D-Phen MSN and L-Phen MSN in healthy human fibroblast (GM08680)

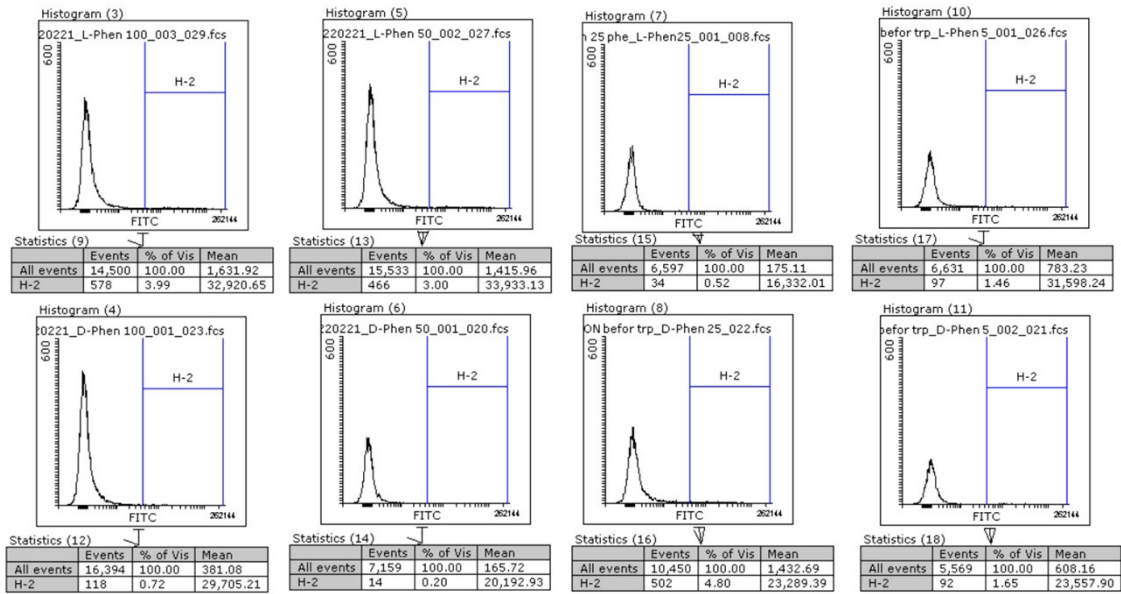

Figure S20. Flow cytometry of the internalization of fluorescent L-/D-Phen MSN in healthy human fibroblast (GM08680) at different incubation concentrations (5, 25, 50 and 100 µg/mL)

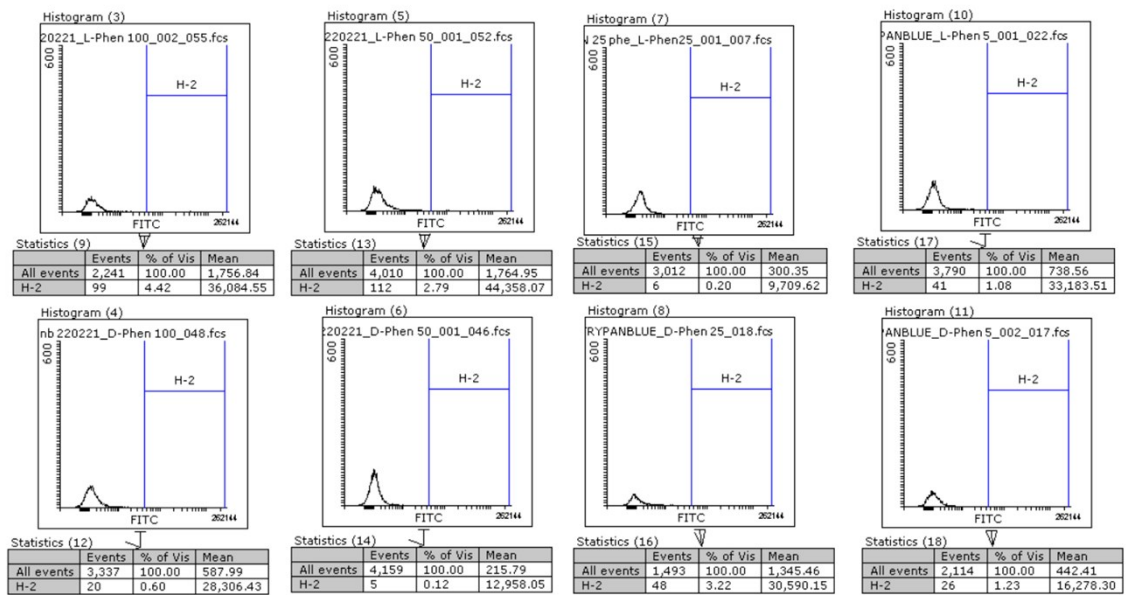

Figure S21. Flow cytometry of trypan blue treated GM08680 cells incubated in the presence to a certain amount (5, 25, 50 and 100 µg/mL) of fluorescent L-/D-Phen MSN.

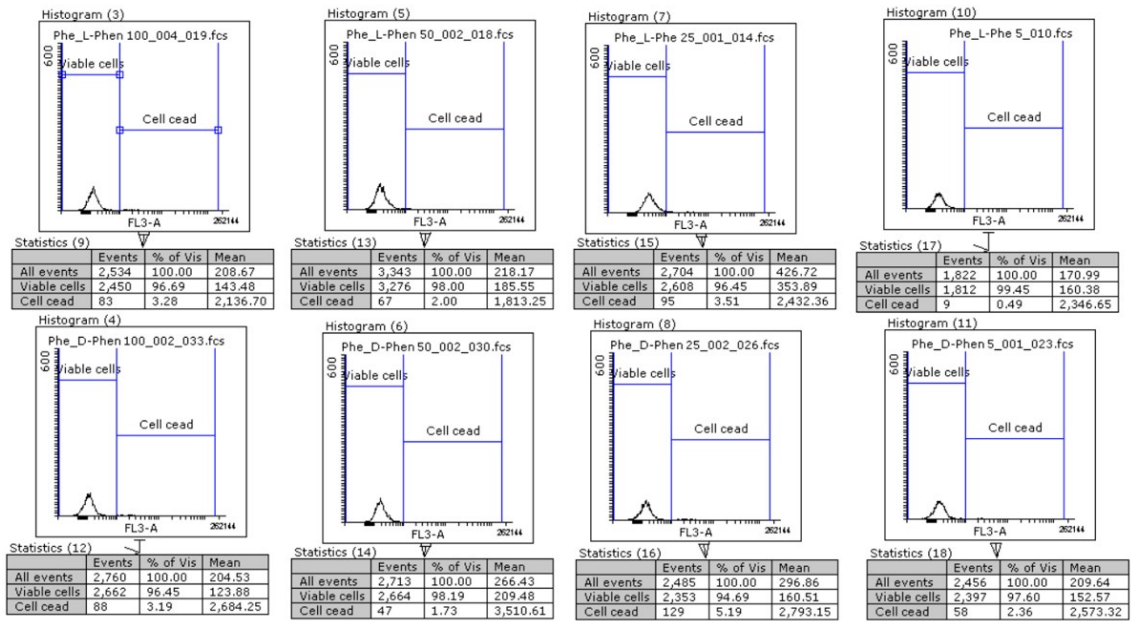

Figure S22. Flow cytometry measurements of the cytotoxicity of a certain amount (5, 25, 50 and 100  $\mu\text{g/mL}$ ) of L-/D-Phen MSN in GM08680 cells after 24 h of treatment.

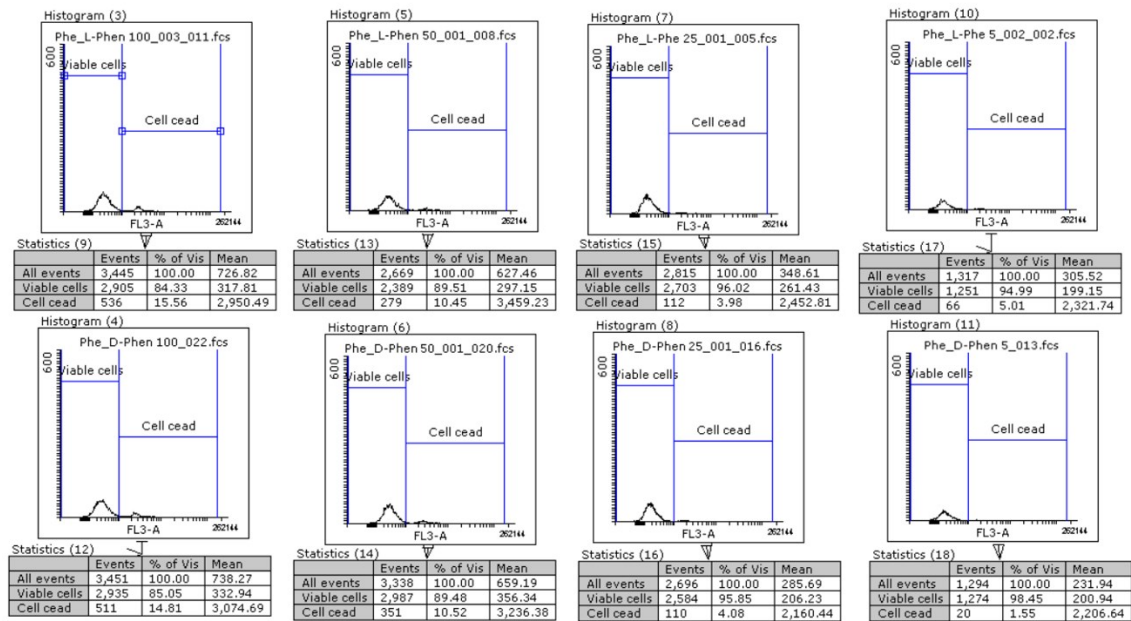

Figure S23. Flow cytometry measurements of the cytotoxicity of a certain amount (5, 25, 50 and 100  $\mu\text{g/mL}$ ) of L-/D-Phen MSN in GM08680 cells after 48 h of treatment.

## 7) Flow cytometry Data of D/L-Cys MSN and D/L-Phen MSN in *S. aureus* bacteria

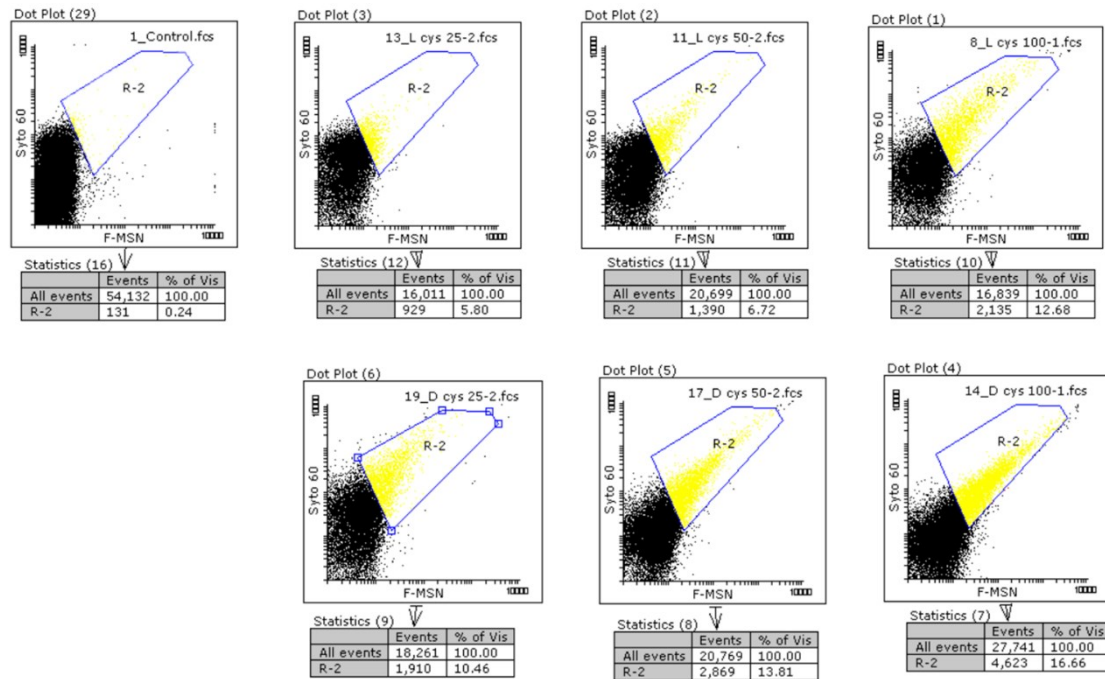

Figure S24. Flow cytometry of *S. aureus* bacteria incubated in the presence to a certain amount (25, 50 and 100  $\mu\text{g}/\text{mL}$ ) of fluorescent L-/D-Cys MSN.



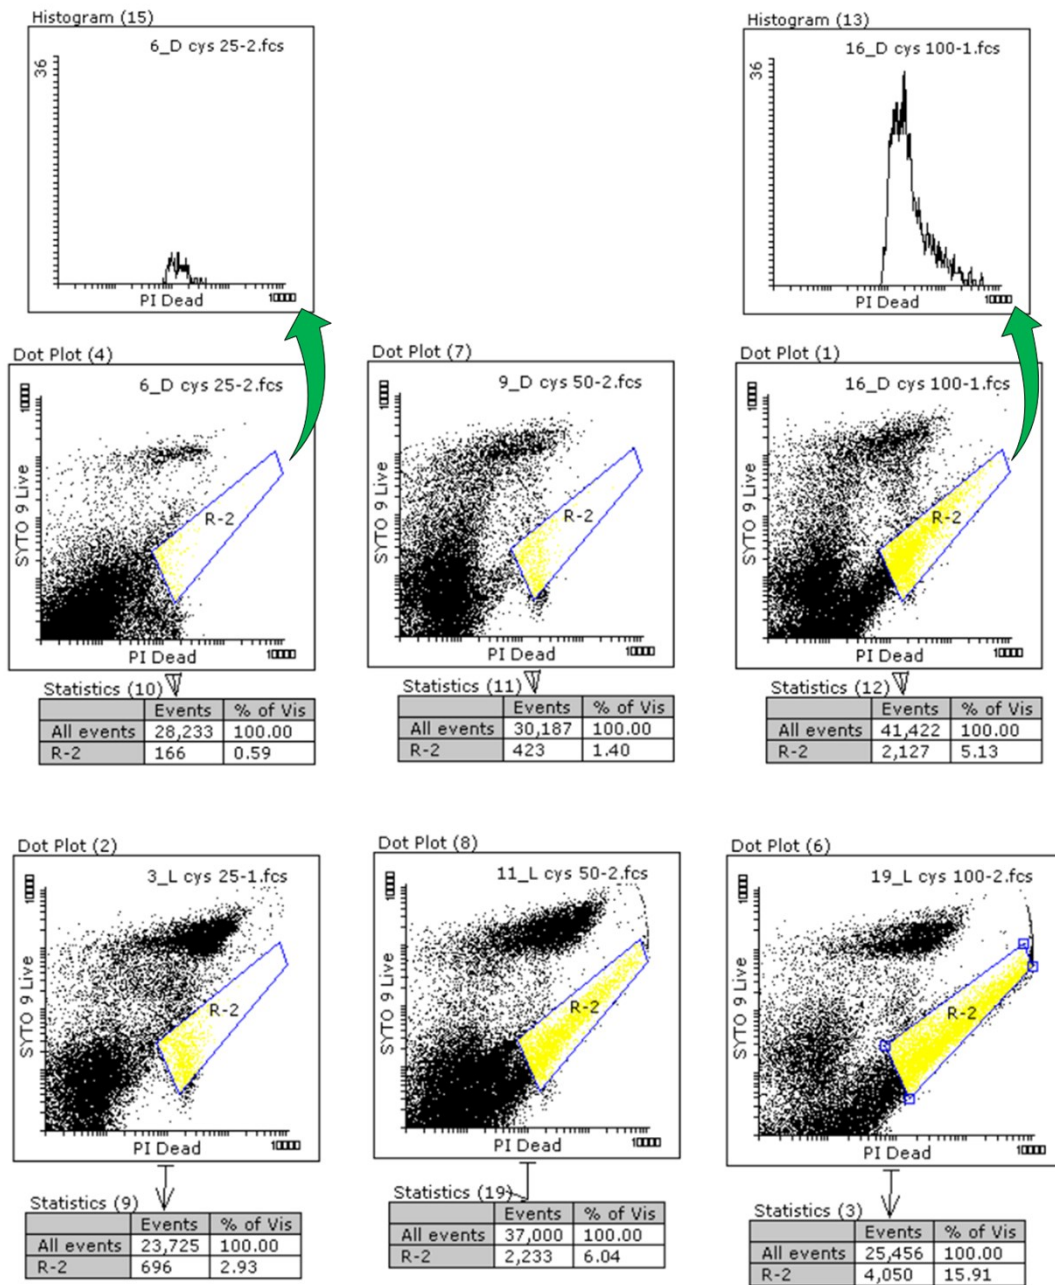

Figure S25. Flow cytometry of *S. aureus* bacteria incubated in the presence to a certain amount (25, 50 and 100  $\mu\text{g}/\text{mL}$ ) of L-/D-Cys MSN and treated with (LIVE/DEAD™ BacLight™ Bacterial Viability Kit).

## 8) Flow cytometry Data of D-Phen MSN and L-Phen MSN in *S. aureus* bacteria

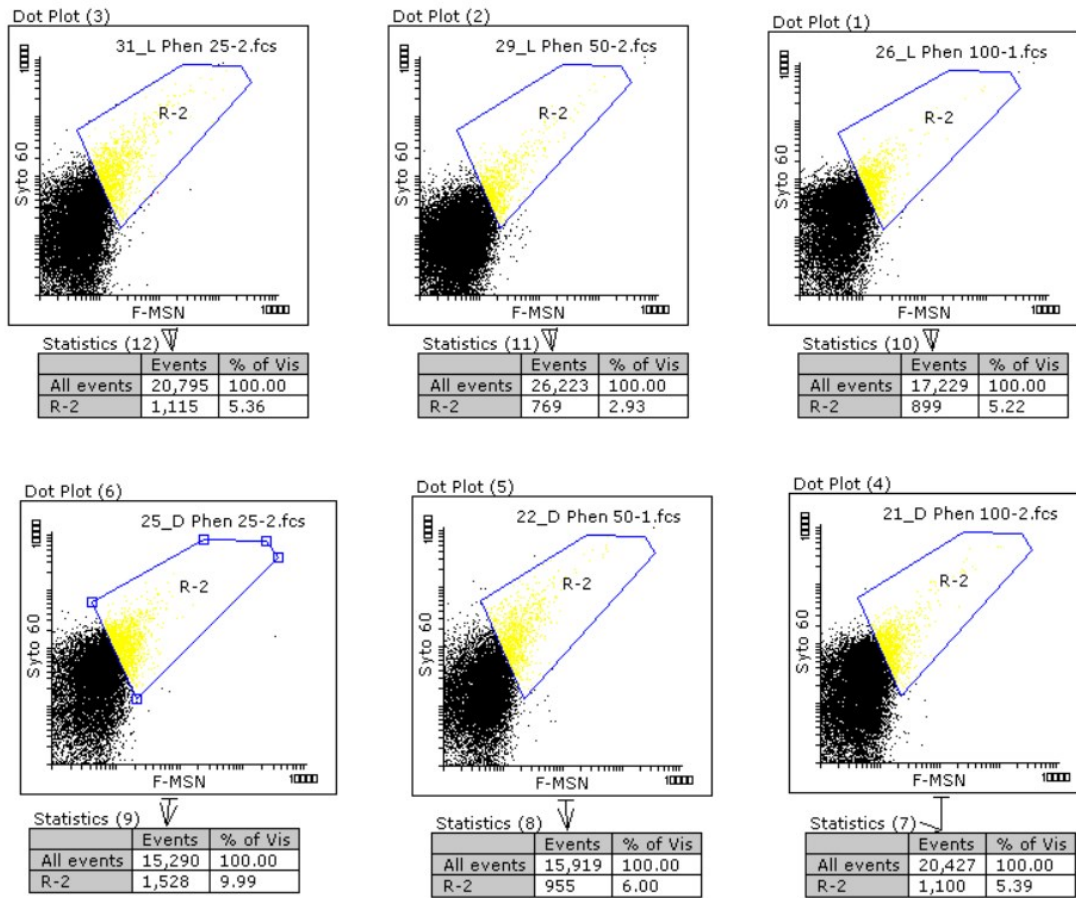

Figure S26. Flow cytometry of *S. aureus* bacteria incubated in the presence to a certain amount (25, 50 and 100 µg/mL) of fluorescent L-/D-Phen MSN.

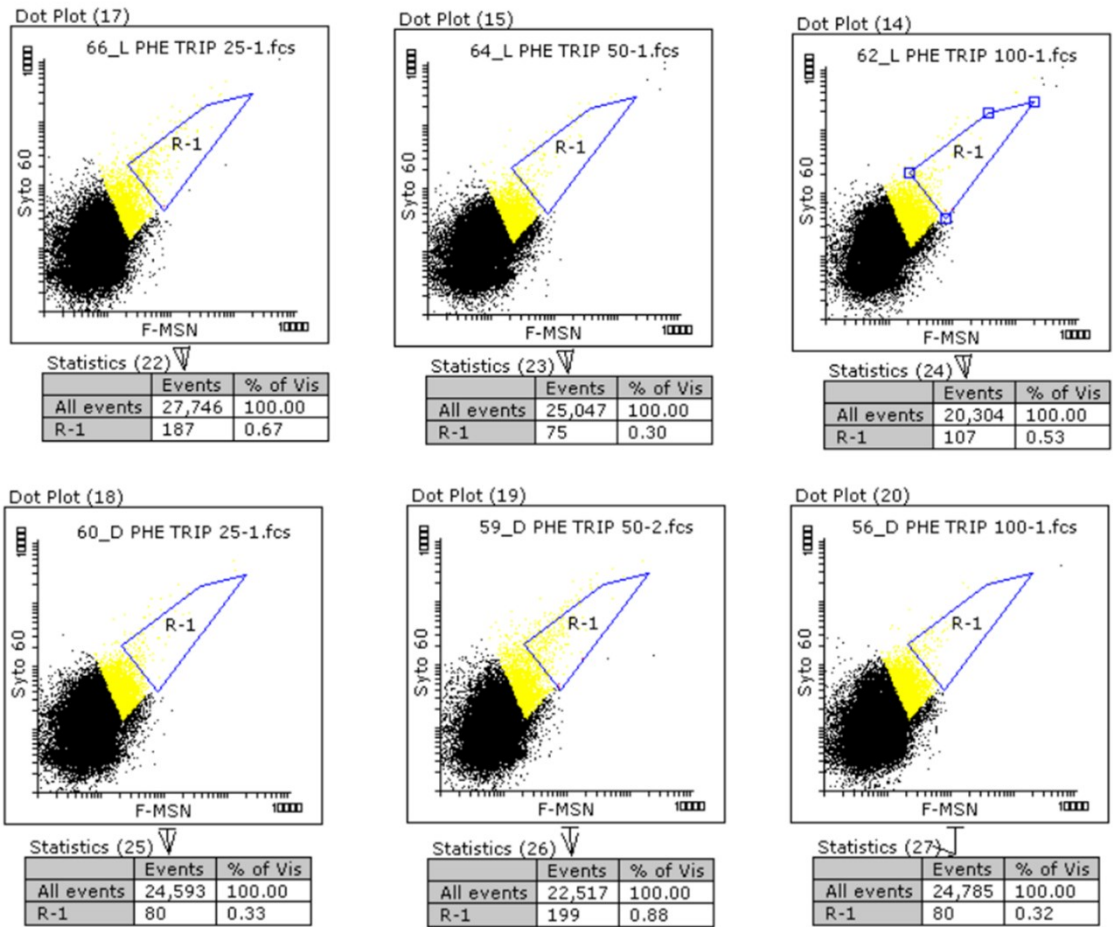

Figure S27. Flow cytometry of trypan blue treated *S. aureus* bacteria incubated in the presence to a certain amount (25, 50 and 100 µg/mL) of fluorescent L-/D-Phen MSN. The yellow fraction is considered F-MSN<sup>+</sup> in absence of trypan blue, R1 is the F-MNS<sup>+</sup> fraction in the presence of trypan blue.

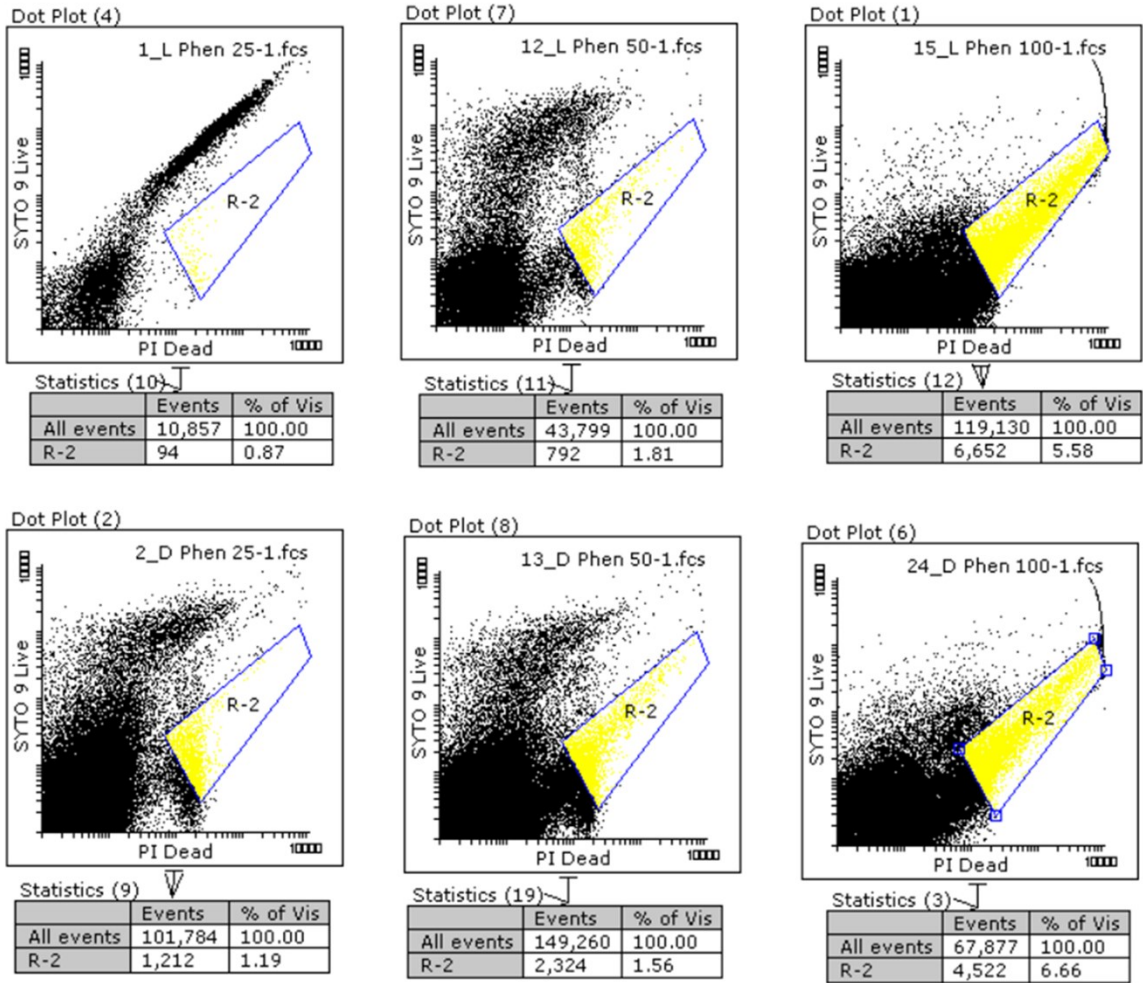

Figure S28. Flow cytometry of *S. aureus* bacteria incubated in the presence to a certain amount (25, 50 and 100 µg/mL) of L-/D-Cys MSN and treated with (LIVE/DEAD™ BacLight™ Bacterial Viability Kit).
